# Supplementary material for: Highly Effective Self-Propagating Synthesis of Lamellar ZnO-Decorated MnO2 Nanocrystals with Improved Supercapacitive Performance
Source: MDPI journal article supplement (doi:10.3390/nano11071680), 2021-06-25
Supplement: s1 [file s1]

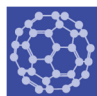

Supplementary Materials

# Highly Effective Self-Propagating Synthesis of Lamellar ZnO-Decorated MnO<sub>2</sub> Nanocrystals with Improved Supercapacitive Performance

Luming Li <sup>1,2</sup>, Jing Li <sup>2,\*</sup>, Hongmei Li <sup>1</sup>, Li Lan <sup>1</sup> and Jie Deng <sup>1,\*</sup>

<sup>1</sup> School of Food and Biological Engineering, Chengdu University, Chengdu 610106, China; liluming@cdu.edu.cn (L.L.); lihongmei@cdu.edu.cn (H.L.); 1020200502@jxstnu.edu.cn (L.L.)

<sup>2</sup> School of Chemical Engineering, Sichuan University, Chengdu 610065, China

\* Correspondence: jingli0726@g.ucla.edu (J.L.); dengjie@cdu.edu.cn (J.D.)

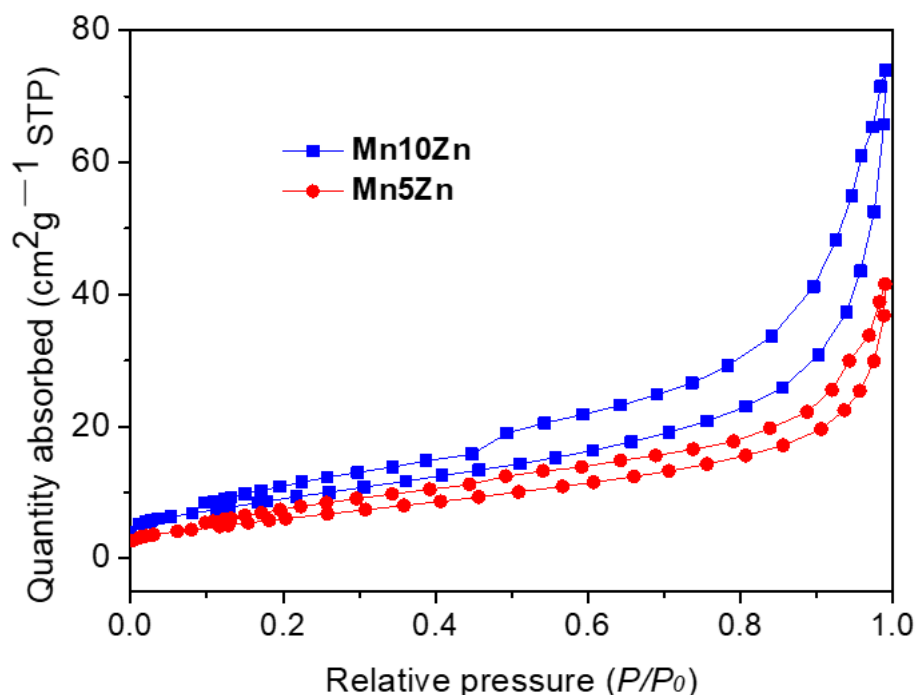

Figure S1. The N<sub>2</sub> adsorption-desorption curves of Mn10Zn and Mn5Zn samples.

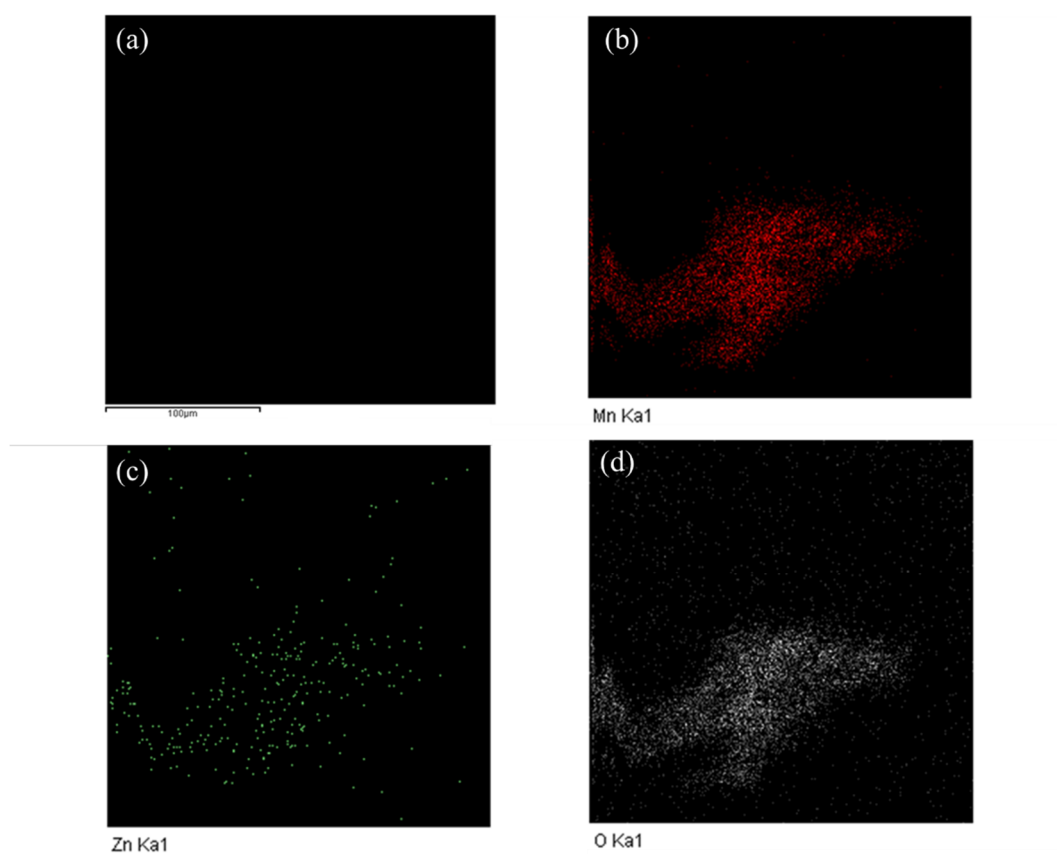

**Figure S2.** Images of energy-dispersion X-ray spectroscopy (EDX) (a) and element mapping of Mn (b), Zn (c) and O (d), respectively.
